# Supplementary material for: The self-organization of plant microtubules inside the cell volume yields their cortical localization, stable alignment, and sensitivity to external cues
Source: PLOS journal article supplement (doi:10.1371/journal.pcbi.1006011), 2018-02-20

**A**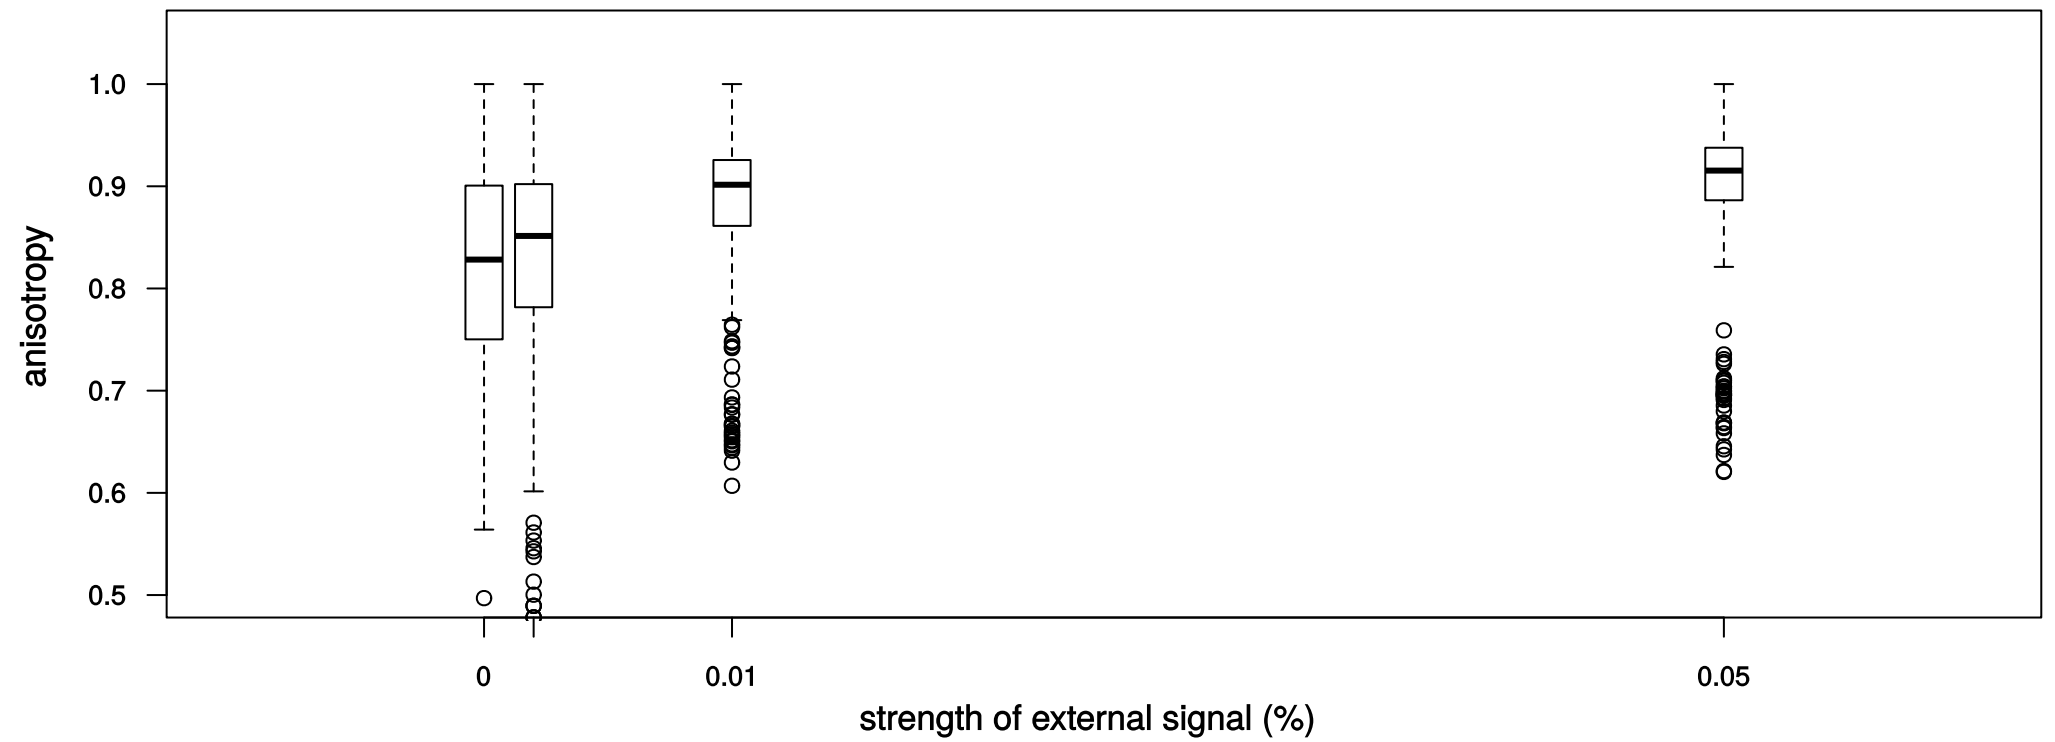**B**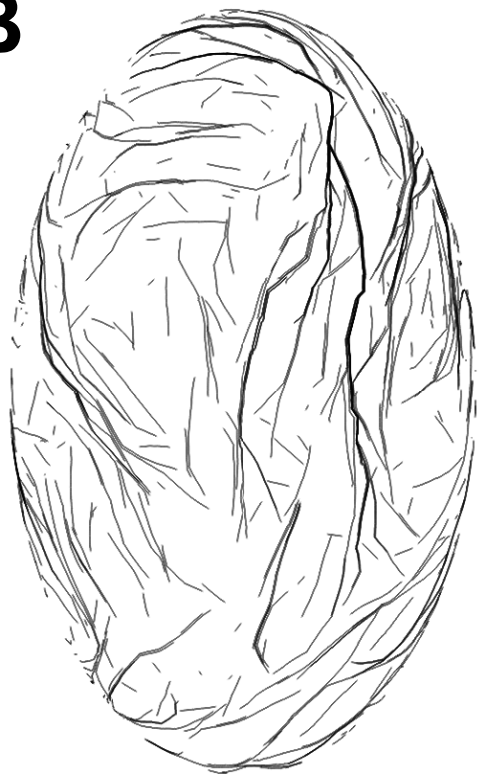**C**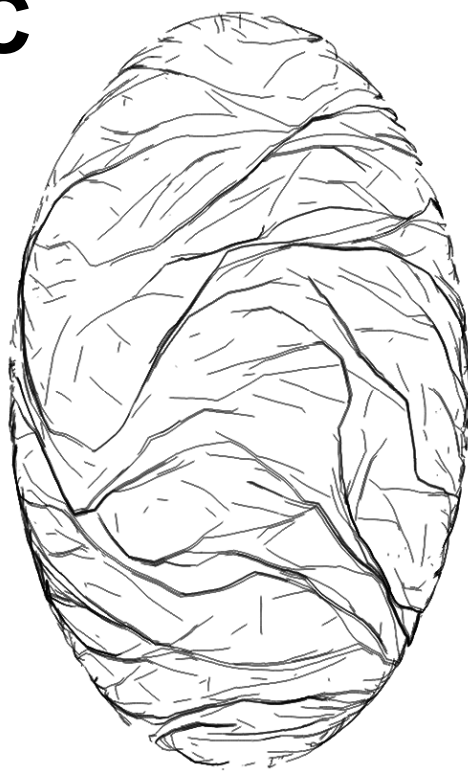**D**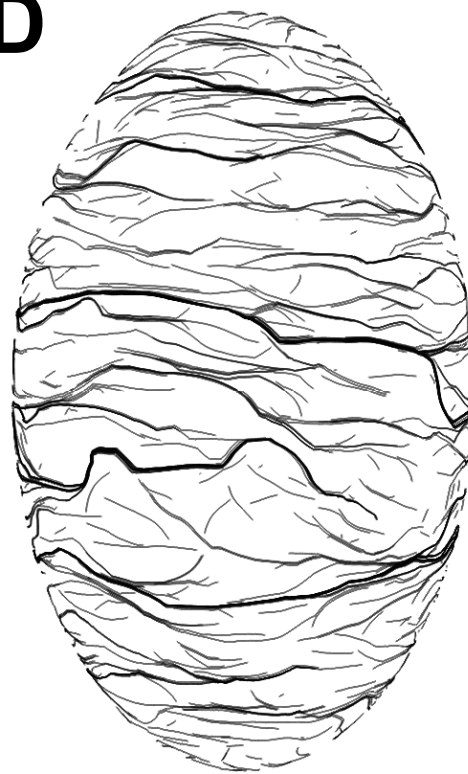**E**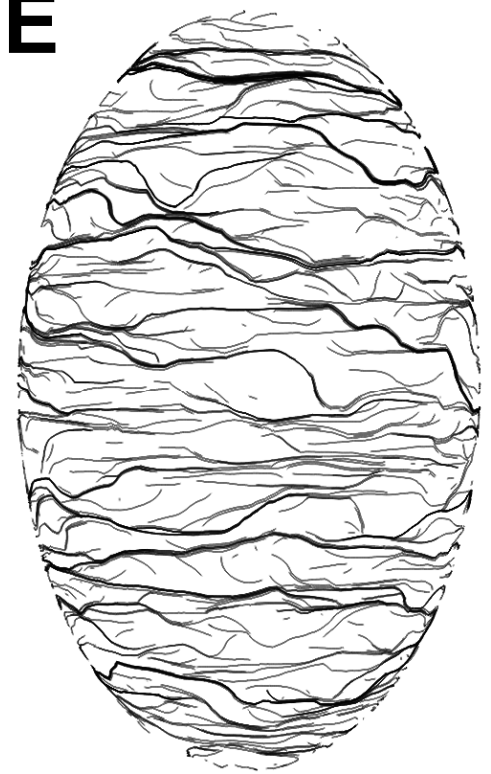

Supplement: S1 (10.1371/journal.pcbi.1006011.s001) [file journal.pcbi.1006011.s001.pdf]
